# Supplementary material for: Metal–phenolic networks acted as a novel bio-filler of a barrier membrane to improve guided bone regenerationviamanipulating osteoimmunomodulation
Source: Royal Society of Chemistry journal article supplement (doi:10.1039/d2tb01804g), 2022-01-01
Supplement: d2tb01804g1.pdf [file d2tb01804g1.pdf]

**Metal-phenolic networks Acted as a Novel Bio-filler of a Barrier Membrane to  
Improve Guided Bone Regeneration via Manipulating Osteoimmunomodulation**

Lulu Ren,<sup>#abc</sup> Pei Gong,<sup>#abc</sup> Xinghui Gao,<sup>abc</sup> Qian Wang,<sup>d</sup> Li Xie,<sup>abc</sup> Wei Tang,<sup>abc</sup> Jie  
Long,<sup>abc</sup> Can Liu,<sup>e</sup> Weidong Tian,<sup>\*abc</sup> and Min He<sup>\*abc</sup>

<sup>a</sup> Engineering Research Center of Oral Translational Medicine, Ministry of Education,  
West China Hospital of Stomatology, Sichuan University, Chengdu, Sichuan 610041,  
China

<sup>b</sup> National Engineering Laboratory for Oral Regenerative Medicine, West China  
Hospital of Stomatology, Sichuan University, Chengdu, Sichuan 610041, China

<sup>c</sup> State Key Laboratory of Oral Diseases, West China Hospital of Stomatology, Sichuan  
University, Chengdu, Sichuan 610041, China

<sup>d</sup> College of Polymer Science and Engineering, Sichuan University, Chengdu, Sichuan  
610065, China

<sup>e</sup> Beijing Jimafei Technology Development Co., LTD

<sup>#</sup> Lulu Ren and Pei Gong contributed equally to this work.

<sup>\*</sup> Corresponding authors.

Prof. Weidong Tian Tel: +86-028-85502122, Fax: 028-85503499, E-mail:

[drtwd@sina.com](mailto:drtwd@sina.com);

Min He: [635798713@qq.com](mailto:635798713@qq.com)

## **1 Experimental section**

### **1.1 Cell culture**

Rat bone mesenchymal stem cells (BMSCs) and a murine-derived macrophage cell line (RAW264.7) were applied in this study. BMSCs were isolated from tibias and fibulae of SD rats and then cultured in  $\alpha$ -MEM containing 10% fetal bovine serum (FBS) and 1% (v/v) penicillin/streptomycin at 37 °C with a 5%  $CO_2$  atmosphere. RAW264.7 cells were purchased from Procell Life Science & Technology Co. Ltd. in Wuhan and cultured in DMEM containing normal FBS and penicillin/streptomycin at 37 °C with a 5%  $CO_2$  atmosphere.

### **1.2 The effects of Sr concentration on cells proliferation**

Both BMSCs and RAW264.7 cells were respectively cultured for 1, 3, 5 days in the medium supplemented with different concentrations of  $SrCl_2$  at a density of  $3 \times 10^3$  cells/well in a 96-well-plate. Then the medium was replaced by medium containing 10% CCK8-reagent (KeyGEN BioTECH, Nanjing, China) and incubated for 30 minutes in the dark. After incubation, absorbance of the supernatant at 450 nm wavelength was tested.

### **1.3 The effects of Sr concentration on osteogenic differentiation**

To investigate the osteogenic function of different doses of  $Sr^{2+}$ , qualitative and quantitative alkaline phosphatase (ALP) activity and the expression of osteogenesis-related genes of BMSCs were tested. Qualitative alkaline phosphatase (ALP) activity was measured using a 5-bromo-4-chloro-3-indolyl phosphate/p-nitro blue tetrazolium (BCIP/NBT) ALP colour development kit (Beyotime Co, Shanghai, China) at a density

of  $2 \times 10^4$  cells/well in a 24-well-plate. After culturing in osteogenic medium for 7 days, the cells were fixed with 4% paraformaldehyde, rinsed with PBS, stained with the kit, and observed under an optical microscope. Also, quantitative ALP activity was measured by Alkaline phosphatase assay kit (Nanjing Jiancheng Bioengineering Institute, Nanjing, China). After incubation for 7 days, the cells were collected and lysed on ice. Then, the lysates were collected for further test using the kit under the construction of the manufacture. To investigate the expression of osteogenesis-related genes, BMSCs were cultured in a 6-well-plate at a density of  $2 \times 10^5$  cells/well for 7 days. Total RNA was extracted from the BMSCs by the Trizol method (Thermo Fisher Scientific, USA). Complementary DNA was synthesized from 1  $\mu$ g total RNA with a HiScript Q Select RT SuperMix for qPCR kit (Nanjing Vazyme Biotech Co., Ltd. China). Quantitative gene expression analysis of osteocalcin (OCN), osteopontin (OPN) and runt-related transcription factor 2 (RUNX2) was carried out by RT-PCR with the SYBR Premix Ex Taq system (Takara Biotechnology, Japan).

#### **1.4 The effects of Sr concentration on immunomodulatory function**

To test the immunomodulatory function of different concentration of  $\text{Sr}^{2+}$ , RT-PCR was conducted to assess the expression of the inflammatory-related genes (IL-10, IL-1 $\beta$ , Il-6) and macrophage phenotype-related genes (CD206) of RAW264.7 cells after co-cultured with medium supplemented with different doses of  $\text{SrCl}_2$  for 1 day.

## **2 Supplementary Figure**

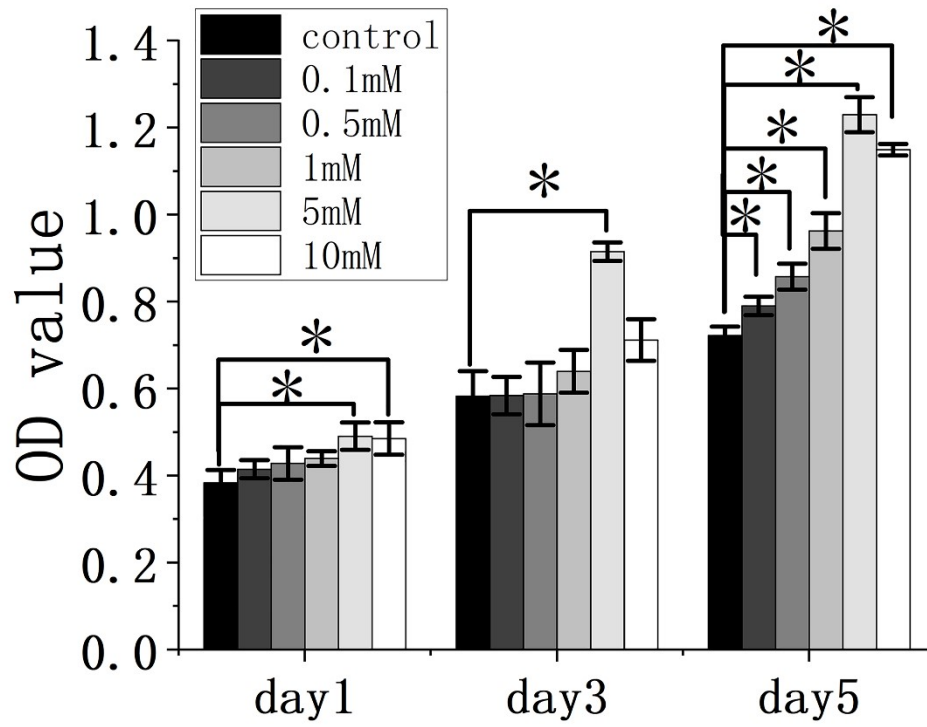

**Fig. S1.** The result of CCK8 test of BMSCs after co-culturing with different doses of  $\text{Sr}^{2+}$  at day 1, 3, 5. Significant differences are indicated as \* ( $P < 0.05$ ).

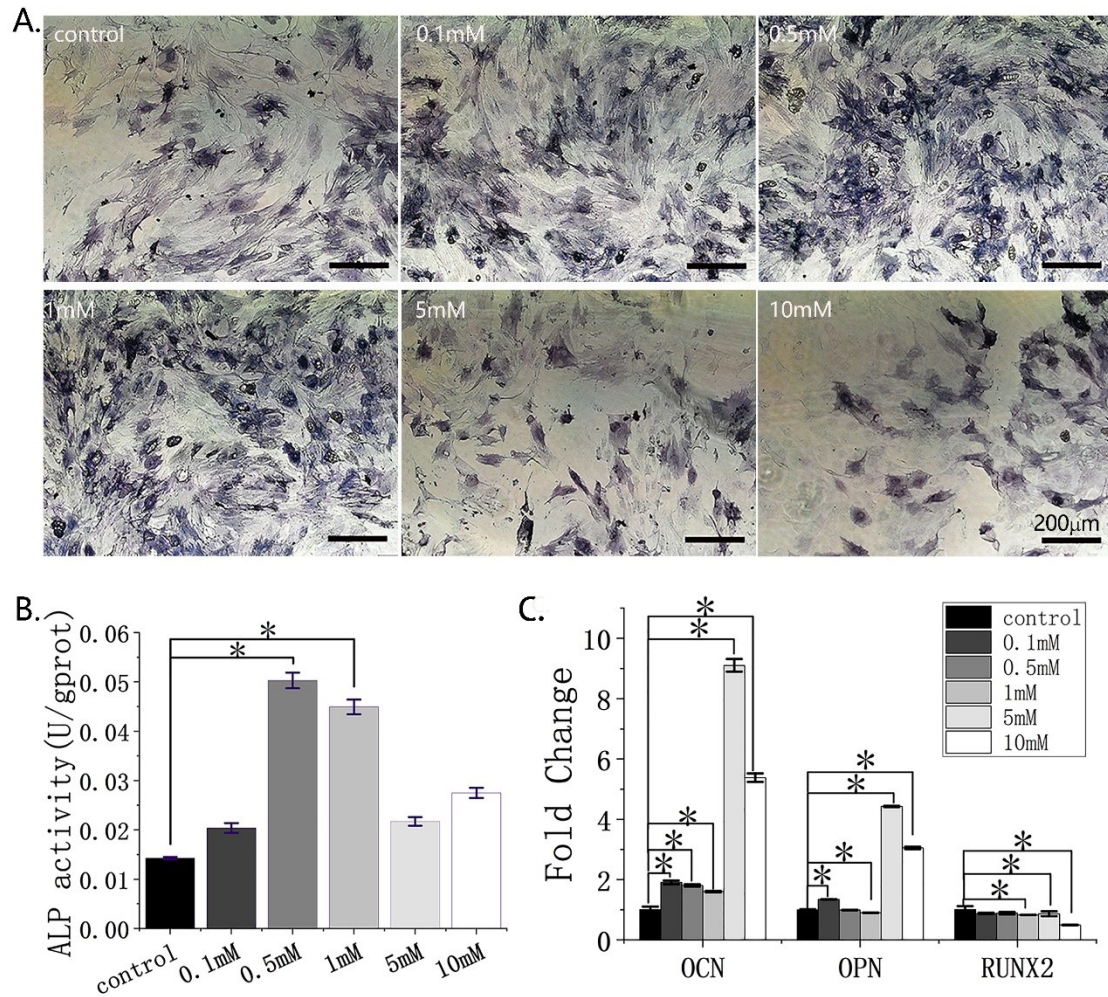

**Fig. S2.** (A) ALP staining of BMSCs cultured by the medium supplemented with different concentrations of Sr<sup>2+</sup>. (B) Quantitative analysis of ALP activity of BMSCs cultured by the medium supplemented with different concentrations of Sr<sup>2+</sup>. (C) Analysis of osteogenic-related genes expression of BMSCs after co-cultured with osteogenic medium containing different concentrations of Sr<sup>2+</sup>. Significant differences are indicated as \* (P < 0.05).

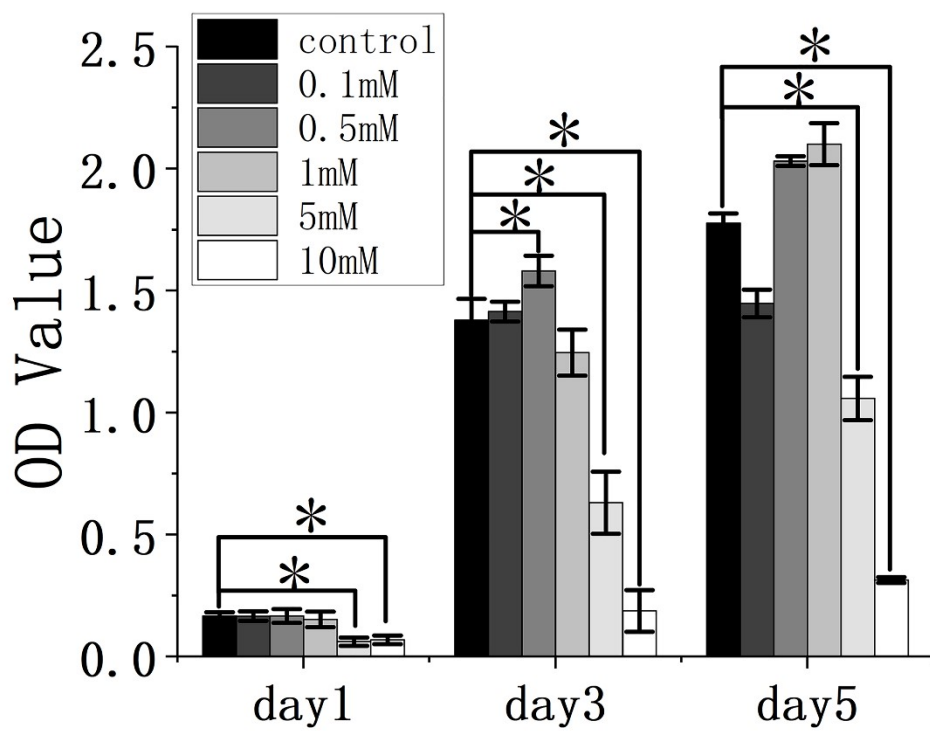

**Fig. S3.** The result of CCK8 test of RAW264.7 cells after co-culturing with different doses of Sr<sup>2+</sup> at day 1, 3, 5. Significant differences are indicated as \* (P < 0.05).

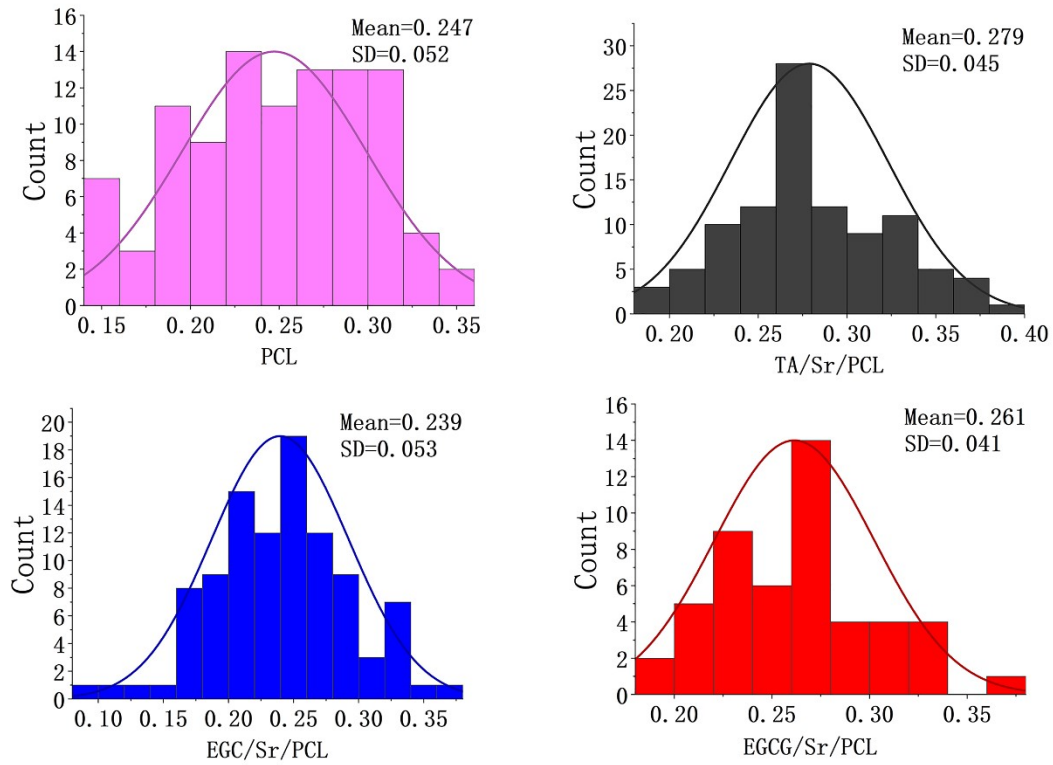

**Fig. S4.** The diameter of the nanofibers of different nanofibrous membranes. The diameter was measured in  $\mu\text{m}$ .

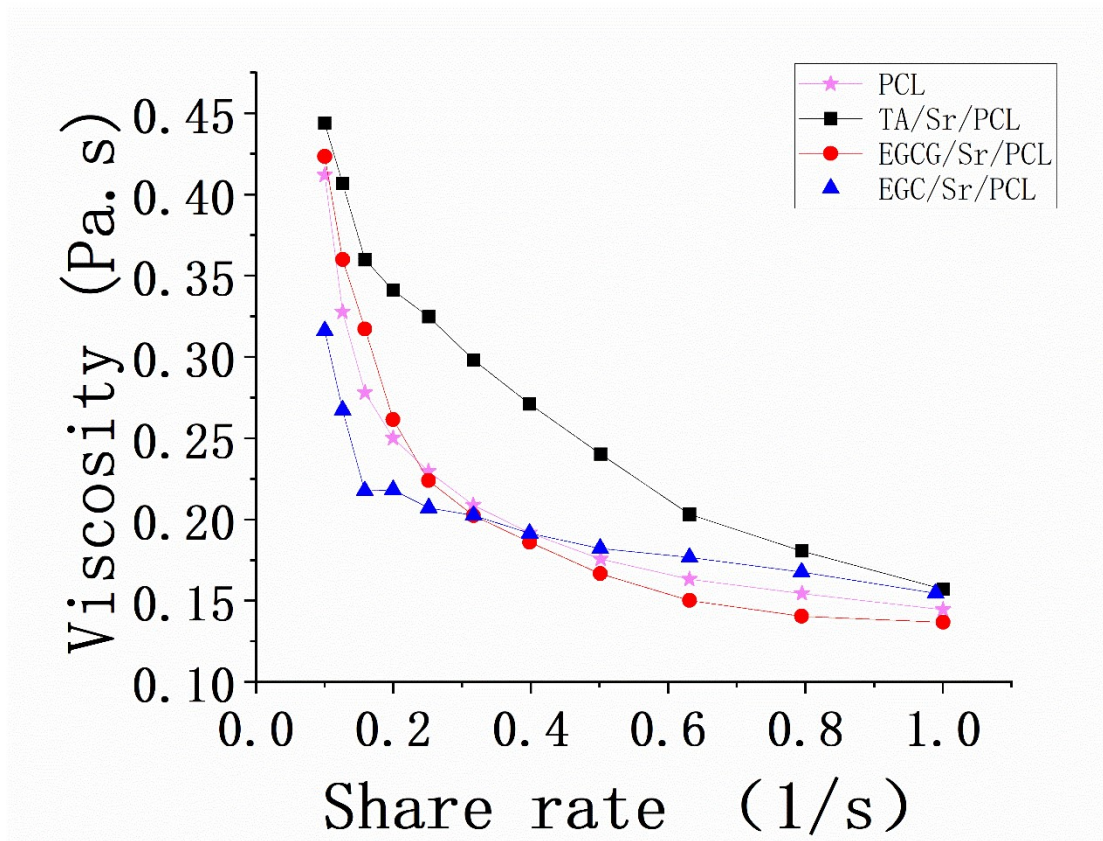



**Fig. S5.** The viscosity results of different electrospinning fluid.

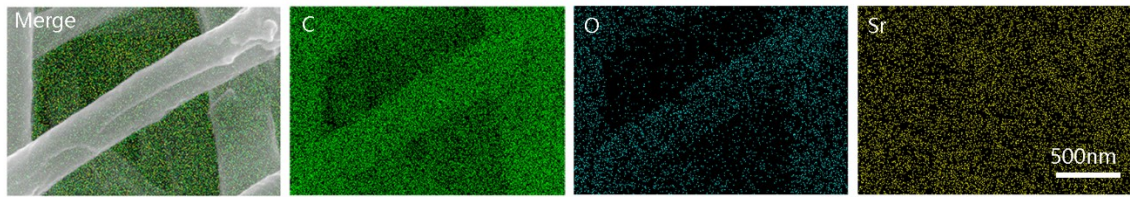

**Fig. S6.** EDS-mapping detection of smaller area of the modified membrane demonstrated that the incorporated Sr element was uniformly distributed.

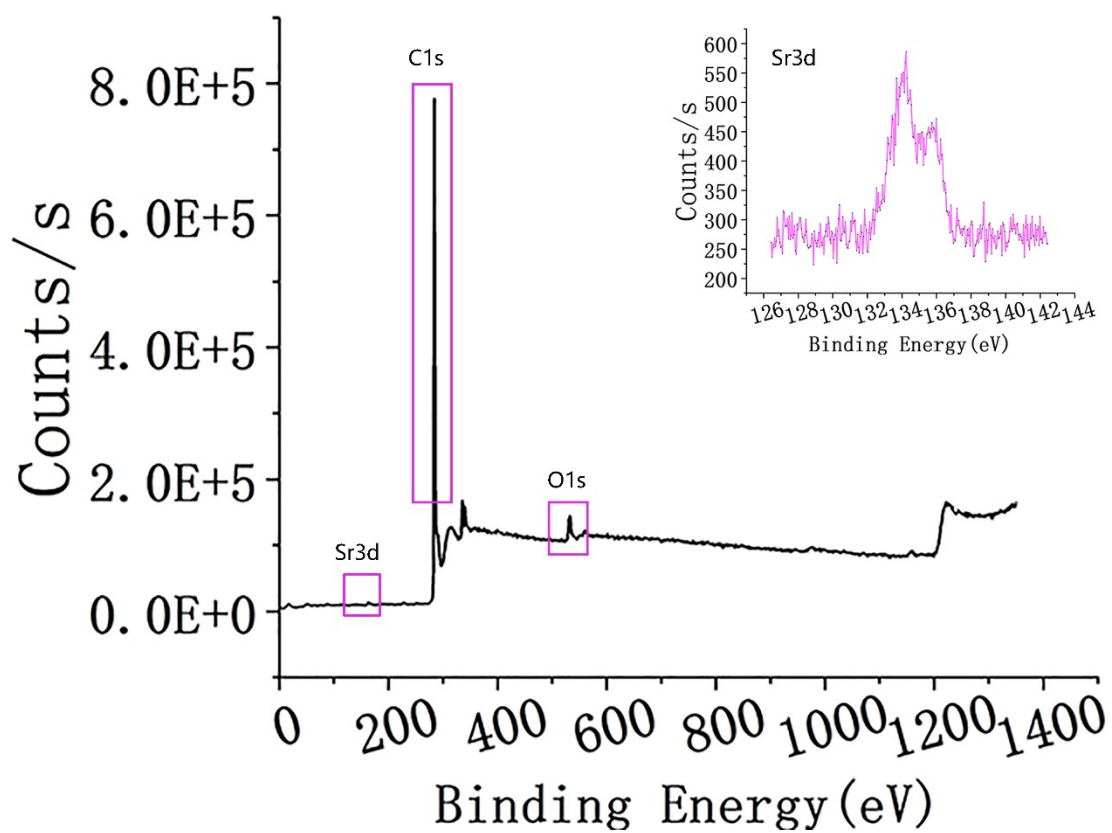

**Fig. S7.** XPS spectrum of TA-Sr-MPNs modified membrane.

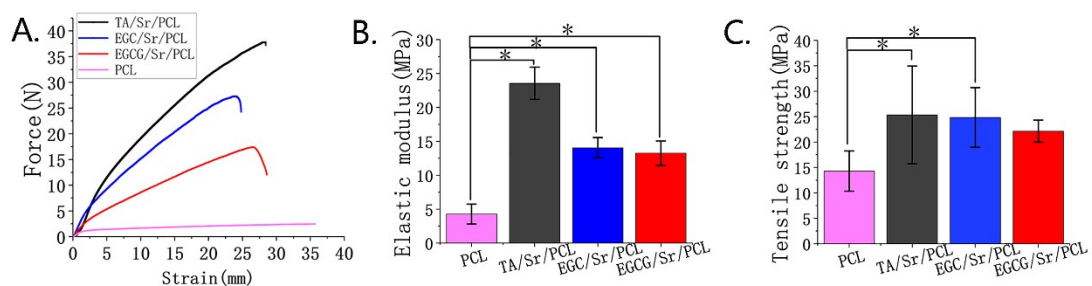

**Fig. S8.** (A) Force-strain curves and (B) The elastic modulus and (C) The tensile strength of polyphenols-Sr-MPNs membranes and pure PCL membrane showing mechanical performance of the membranes. Significant differences are indicated as  $\square$  ( $P \leq 0.05$ ).

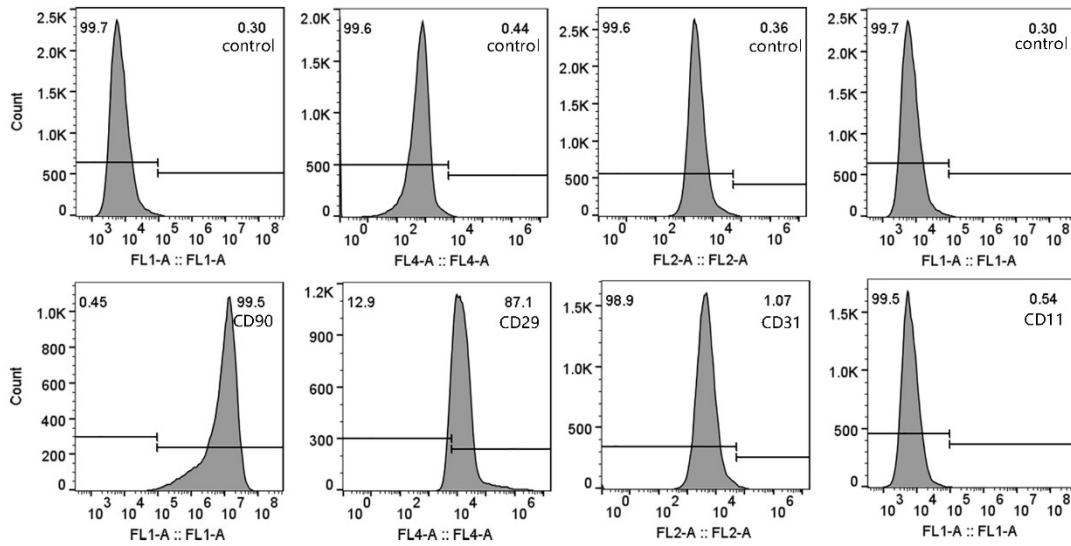

**Fig. S9.** Flow cytometric analysis of the obtained BMSCs which showed the cells marked by positive marker and negative marker.
